# Supplementary material for: Improvement of thermal stability and luminescence in La3ZrxSn1−xGa5O14:0.015Cr3+ by the substitution of Zr # Sn and its application in level detection, biomedical imaging and night vision monitoring
Source: Royal Society of Chemistry journal article supplement (doi:10.1039/d4nj03264k), 2024-01-01
Supplement: d4nj03264k1.pdf [file d4nj03264k1.pdf]

Supporting Information

**Table S1** The Dq/B of  $\text{LZ}_x\text{S}_{1-x}\text{GO}:0.015\text{Cr}^{3+}$  ( $\lambda_{\text{em}}=740$  nm).

| x    | ${}^4\text{A}_2-{}^4\text{T}_2({}^4\text{F}) \lambda_1(\text{nm})$ | ${}^4\text{A}_2-{}^4\text{T}_1({}^4\text{F}) \lambda_2(\text{nm})$ | Dq/B   |
|------|--------------------------------------------------------------------|--------------------------------------------------------------------|--------|
| 0.05 | 430                                                                | 599                                                                | 2.5590 |
| 0.10 | 430                                                                | 597                                                                | 2.5993 |
| 0.15 | 430                                                                | 596                                                                | 2.6198 |
| 0.25 | 430                                                                | 594                                                                | 2.6614 |

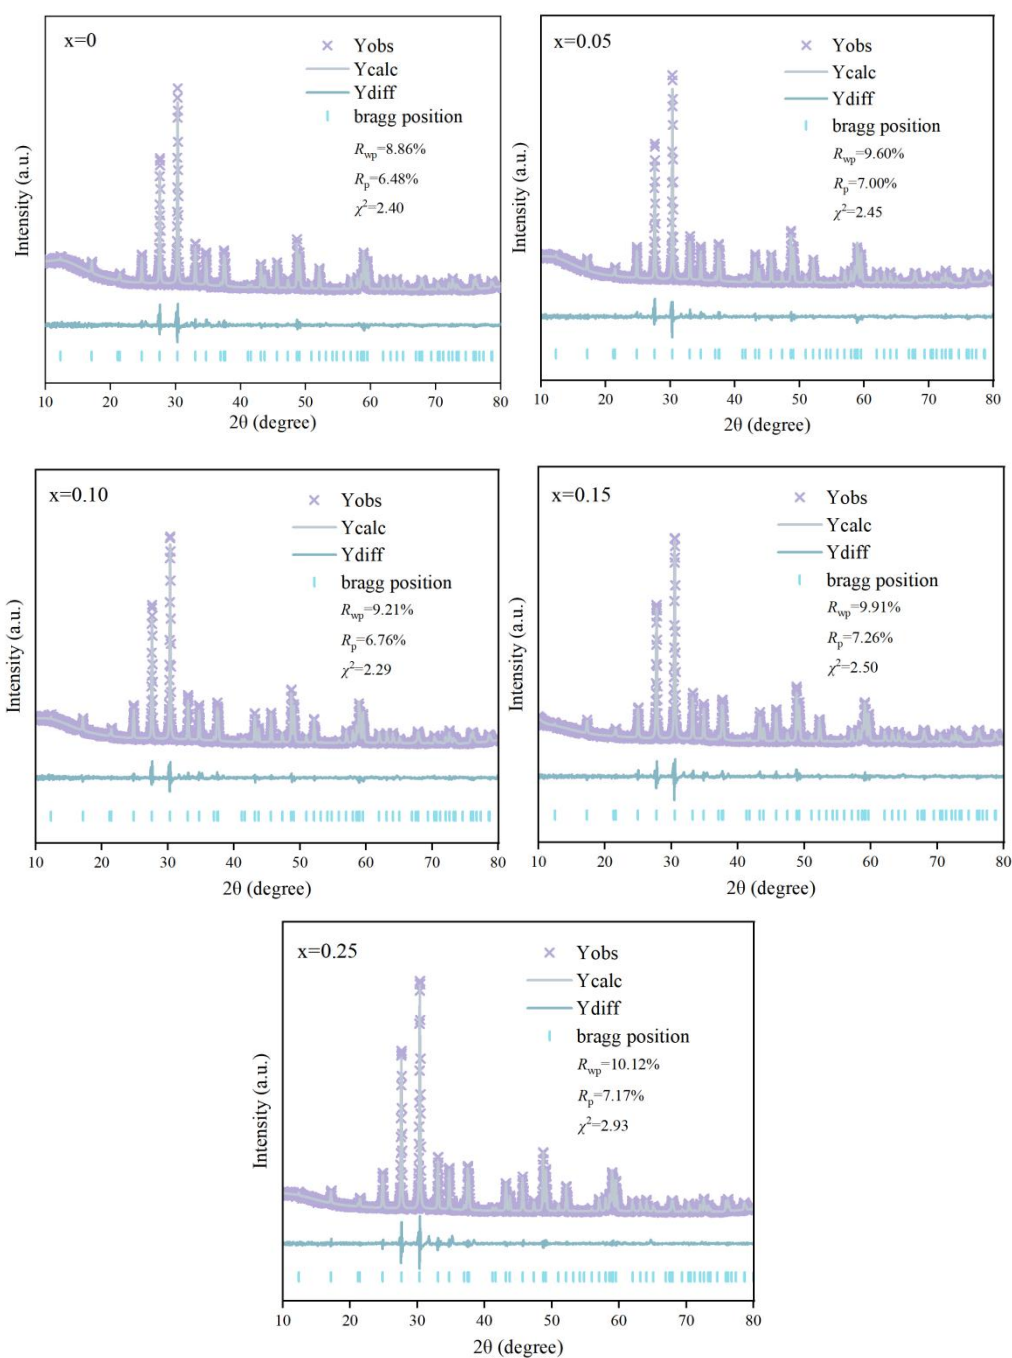

**Figure S1** Rietveld refinements of  $\text{LZ}_x\text{S}_{1-x}\text{GO}:0.015\text{Cr}^{3+}$ .

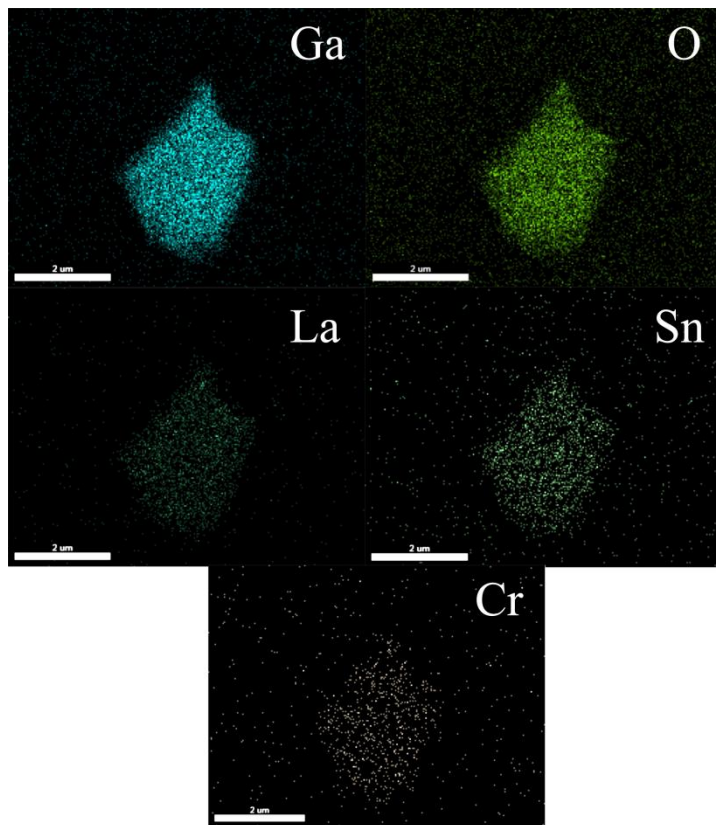

Figure S2 EDS images of other elements.

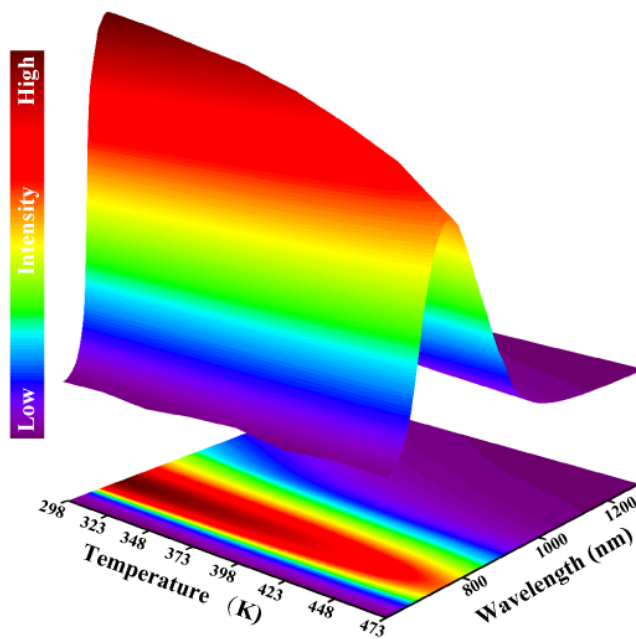

Figure S3 Temperature change spectra of  $\text{La}_3\text{Zr}_{0.15}\text{Sn}_{0.85}\text{Ga}_5\text{O}_{14}:0.015\text{Cr}^{3+}$  at 298-473 K.

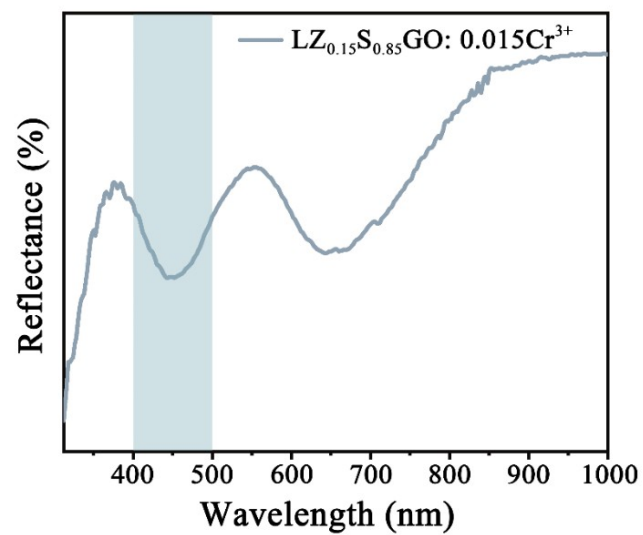

**Figure S4** Diffuse reflection spectrum of  $\text{La}_3\text{Zr}_{0.15}\text{Sn}_{0.85}\text{Ga}_5\text{O}_{14}:0.015\text{Cr}^{3+}$ .
